# Supplementary material for: Real-World Data from a Refractory Triple-Negative Breast Cancer Cohort Selected Using a Clinical Data Warehouse Approach
Source: Cancers (Basel). 2021 Nov 21;13(22):5835. doi: 10.3390/cancers13225835 (PMC8616548; doi:10.3390/cancers13225835)
Supplement: Supplementary file 1 [file cancers-13-05835-s001.zip › cancers-1404109-supplementary.pdf]

# Supplementary Materials: Real-World Data from a Refractory Triple-Negative Breast Cancer Cohort Selected Using a Clinical Data Warehouse Approach

Hana Kim, Hyo-Jung Kim, Hongsik Kim, Hye-Ryeon Kim, Hyunji Jo, Joohyun Hong, Ryul Kim, Ji-Yeon Kim, Jin-Seok Ahn, Young-Hyuck Im, Se-Kyung Lee, Haeyoung Kim, Soo-Yong Shin and Yeon-Hee Park

**Table S1.** Differences of clinical tumor, nodal stages between de novo, nonrefractory metastatic triple-negative breast cancer, and refractory metastatic triple-negative breast cancer after surgery, and unresectable triple-negative breast cancer due to progression during neoadjuvant chemotherapy.

| Group        | De novo mTNBC | Recurrence of mTNBC<br>after Curative Surgery |                                   |                                                     |
|--------------|---------------|-----------------------------------------------|-----------------------------------|-----------------------------------------------------|
|              |               | Nonrefractory<br>mTNBC                        | Refractory mTNBC                  |                                                     |
|              |               |                                               | Refractory mTNBC<br>after Surgery | Unresectable mTNBC<br>d/t Progression<br>during NAC |
| Patient, no. | 69            | 131                                           | 207                               | 44                                                  |
| cT stage     |               |                                               |                                   |                                                     |
| T1           | 4             | 36                                            | 23                                | 4                                                   |
| T2           | 13            | 76                                            | 119                               | 17                                                  |
| T3           | 17            | 14                                            | 55                                | 19                                                  |
| T4           | 24            | 1                                             | 9                                 | 4                                                   |
| Unknown      | 11            | 4                                             | 1                                 | 0                                                   |
| cN stage     |               |                                               |                                   |                                                     |
| N0           | 5             | 55                                            | 56                                | 4                                                   |
| N1           | 3             | 33                                            | 46                                | 17                                                  |
| N2           | 20            | 25                                            | 62                                | 19                                                  |
| N3           | 35            | 16                                            | 42                                | 4                                                   |
| Unknown      | 6             | 2                                             | 1                                 | 0                                                   |

*Abbreviations:* mTNBC, metastatic triple-negative breast cancer.

**Table S2.** Characteristic differences between patients with nonrefractory triple-negative breast cancer and refractory triple-negative breast cancer who could receive surgery with a curative aim.

| No., (%)                      | Nonrefractory mTNBC | Refractory mTNBC |
|-------------------------------|---------------------|------------------|
| Patient, no.                  | 131                 | 207              |
| Surgery type                  |                     |                  |
| BCS                           | 55                  | 80               |
| Mastectomy                    | 76                  | 127              |
| Adjuvant RT                   |                     |                  |
| Yes                           | 89                  | 156              |
| No                            | 42                  | 51               |
| Adjuvant chemotherapy         |                     |                  |
| Yes                           | 101                 | 102              |
| No                            | 30                  | 105              |
| Adjuvant chemotherapy regimen |                     |                  |
| AC                            | 10                  | 9                |
| AC-T                          | 48                  | 30               |
| Capecitabine                  | 1                   | 17               |
| CMF                           | 13                  | 9                |
| FAC                           | 21                  | 19               |
| T                             | 3                   | 8                |
| Others                        | 5                   | 10               |

*Abbreviations:* mTNBC, metastatic triple-negative breast cancer; BCS, breast-conserving surgery; RT, radiation therapy; AC, Adriamycin/cyclophosphamide; AC-T, AC followed by paclitaxel or docetaxel; CMF, cyclophosphamide/methotrexate/fluorouracil; FAC, fluorouracil/Adriamycin/cyclophosphamide; T, paclitaxel or docetaxel.
